# Supplementary material
Source: publisher figshare collection journal article supplement (https://tandf.figshare.com/ndownloader/files/16356491)
Supplement: Supplementary file 1 [file 16356491]

**Supporting Information**

**FIG. 1.** Carbon number distribution of wax used herein.

**FIG. 2.** Major chemical structure of wax used herein.
